# Supplementary material for: Structure-guided discovery of anti-CRISPR and anti-phage defense proteins
Source: PubMed Central journal article supplement (PMC10799925; doi:10.1038/s41467-024-45068-7), 2024-01-20
Supplement: 41467_2024_45068_MOESM1_ESM.pdf [file 41467_2024_45068_MOESM1_ESM.pdf]

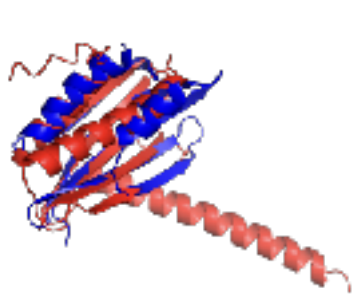

AcrID1  
 IMGVR\_UViG\_3300005530\_000034]-  
 Ga0070679\_10000205]-  
 Ga0070679\_100002053  
 TM-score=0.6249

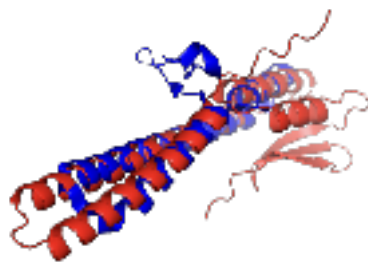

AcrIE1  
 IMGVR\_UViG\_3300022214\_000006]-  
 Ga0224505\_10000123]-  
 Ga0224505\_1000012393  
 TM-score=0.6648

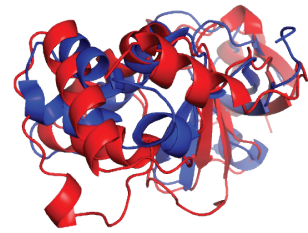

AcrIF11  
 IMGVR\_UViG\_3300031813\_000024]-  
 Ga0316217\_10000462]-  
 Ga0316217\_1000046230  
 TM-score=0.6372

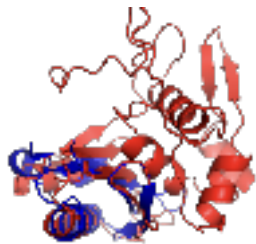

AcrIF5  
 IMGVR\_UViG\_3300033174\_000053]-  
 Ga0334882\_1003602]-  
 Ga0334882\_100360223  
 TM-score=0.6902

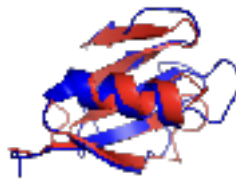

AcrIF9  
 IMGVR\_UViG\_3300009370\_000194]-  
 Ga0118716\_1002994]-  
 Ga0118716\_100299430  
 TM-score=0.7027

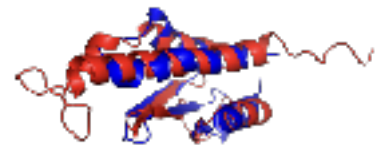

AcrIIA4  
 UGV-GENOME-0360355|UGV-GE-  
 NOME-0360355\_19  
 TM-score=0.6444

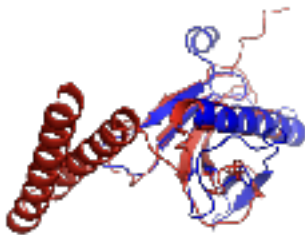

AcrIIC2  
 UGV-GENOME-0368711|UGV-GE-  
 NOME-0368711\_46  
 TM-score=0.6017

**Supplementary Figure 1: Structural comparison between putative and known Acr proteins.**

AlphaFold2 model of candidate Acrs (in red) superposed to known Acr proteins (blue). The candidate Acrs are indicated by their IMG/VR gene id.

**A**

|                                           |                                                                       |            |
|-------------------------------------------|-----------------------------------------------------------------------|------------|
|                                           | <b>75</b>                                                             | <b>119</b> |
| Candidate Acr<br>(AcrVA5 <sub>Bsp</sub> ) | ..... GVATELLKEVI RI YKDFNLYLL CHPMPRGHYDE SHKTVKDLRRFY.....(145)     |            |
|                                           | G+ ++L+ V + ++ L + + P+ + + +DL FY                                    |            |
| AcrVA5                                    | ..... GI GSQLI DMVKDVAREVGLPI GLYAYPQ- - - - DDSI SQEDLI EFY.... (92) |            |
|                                           | <b>32</b>                                                             | <b>72</b>  |

**B**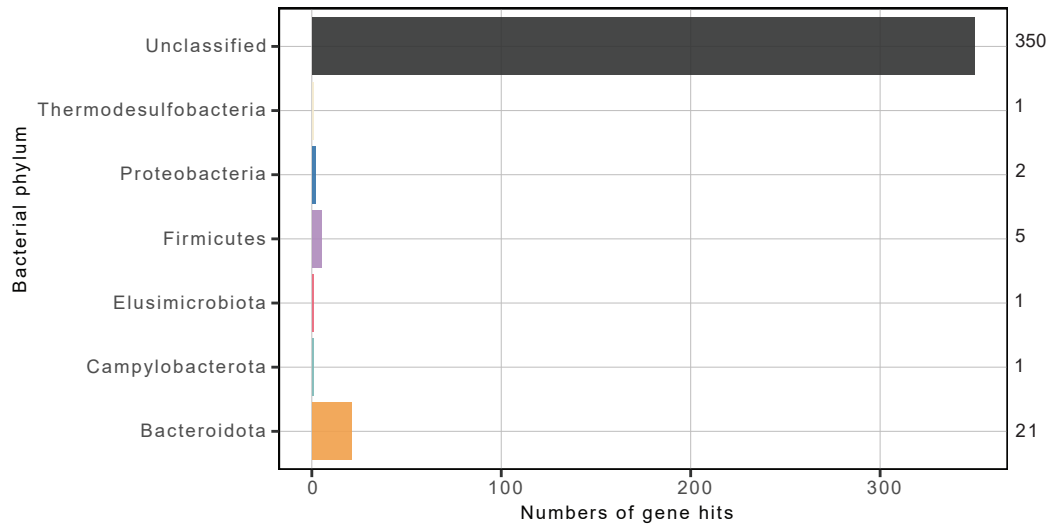**C**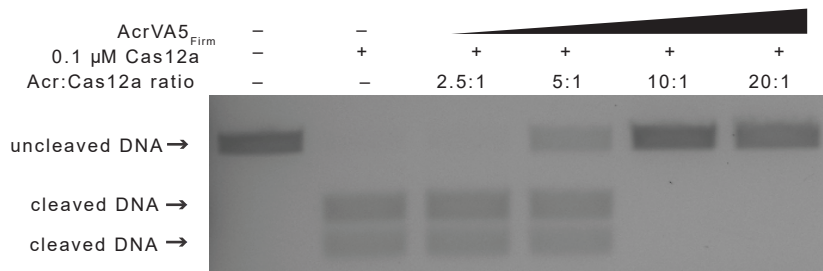

**Supplementary Figure 2: Characterization of AcrVA5<sub>Bsp</sub> and homolog from a Firmicutes host.**

(A) Primary sequence alignment between AcrVA5 and AcrVA5<sub>Bsp</sub>. The numbers in parenthesis show the protein length, while the numbers in bold represent the alignment start and end positions. No significant similarity between both proteins at an evaluate threshold of 0.05. (B) Distribution of BLAST hits of protein-coding genes in the scaffold containing AcrVA5<sub>Bsp</sub>. The BLAST search was implemented in the online server of IMG/VR. Though most of the genes were unassigned, 21 genes had hits in a *Bacteroidota* genome. (C) Agarose gel showing LbCas12a-mediated dsDNA cleavage in the presence of increasing amounts of AcrVA5<sub>Firm</sub>. Acr concentrations used are 0.25, 0.5, 1, and 2 μM. Image is representative of duplicate. Source data are provided as a Source Data file.

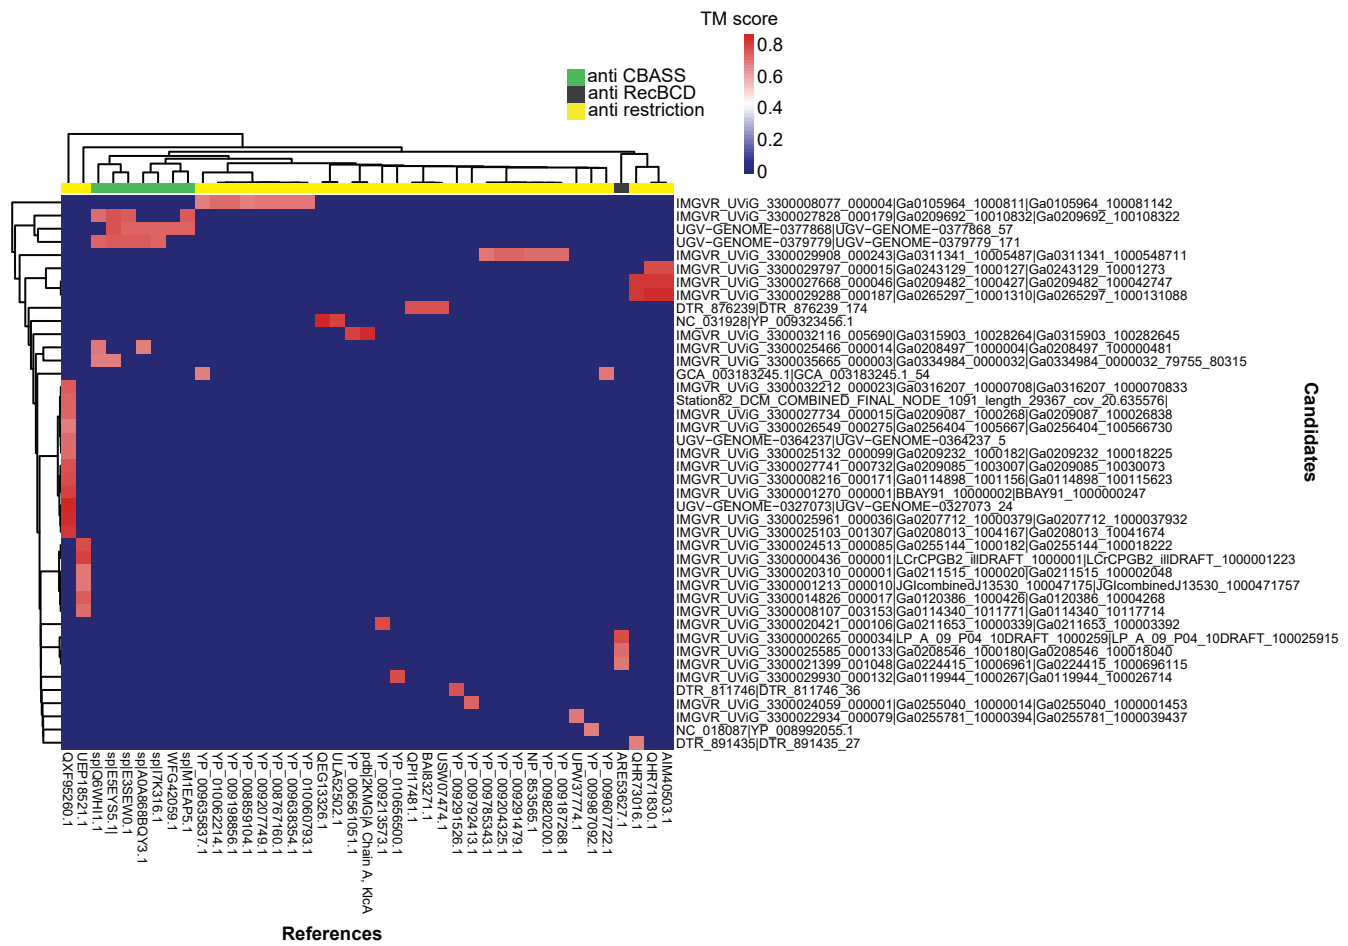

**Supplementary Figure 3: Identification of remote homologs of other phage counter-defenses.** Heatmap showing proteins in IMG/VR (rows) with no sequence similarity, but having high structural similarities to known counter-defenses (columns). For instance, DTR\_891435|DTR\_891435\_27 is structurally similar to a known anti-restriction protein (QHR73016.1)

**A**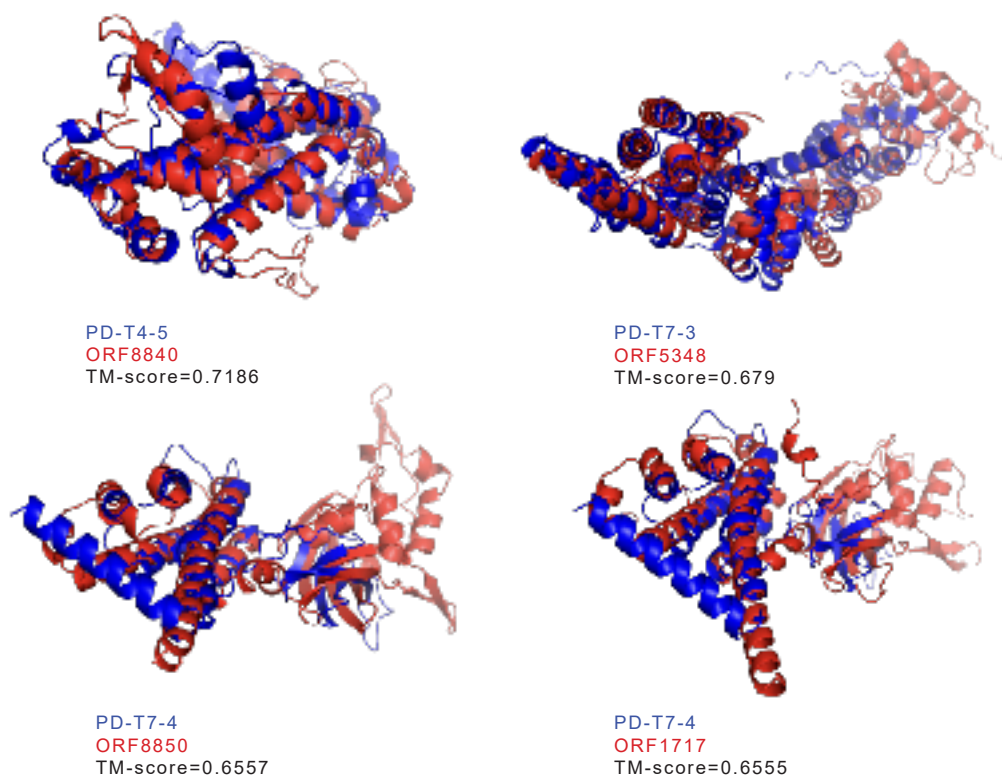**B**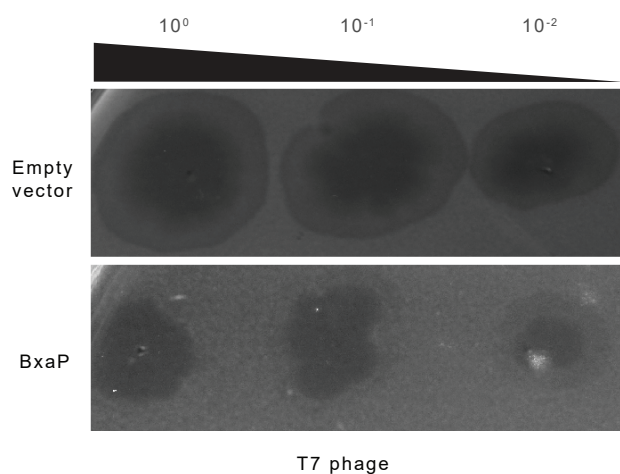

**Supplementary Figure 4: Structural similarities between putative and known defense proteins and effect of BxaP expression on T7 infection.**

(A) AlphaFold2 model of candidate defense proteins (in red) superposed to predicted single-protein defense systems reported in Vassallo *et al.* (blue). (B) A 10-fold serial dilution plaque assay of T7 phage on *E. coli* strain containing either an empty vector or overexpressing BxaP. Image is representative of triplicate.

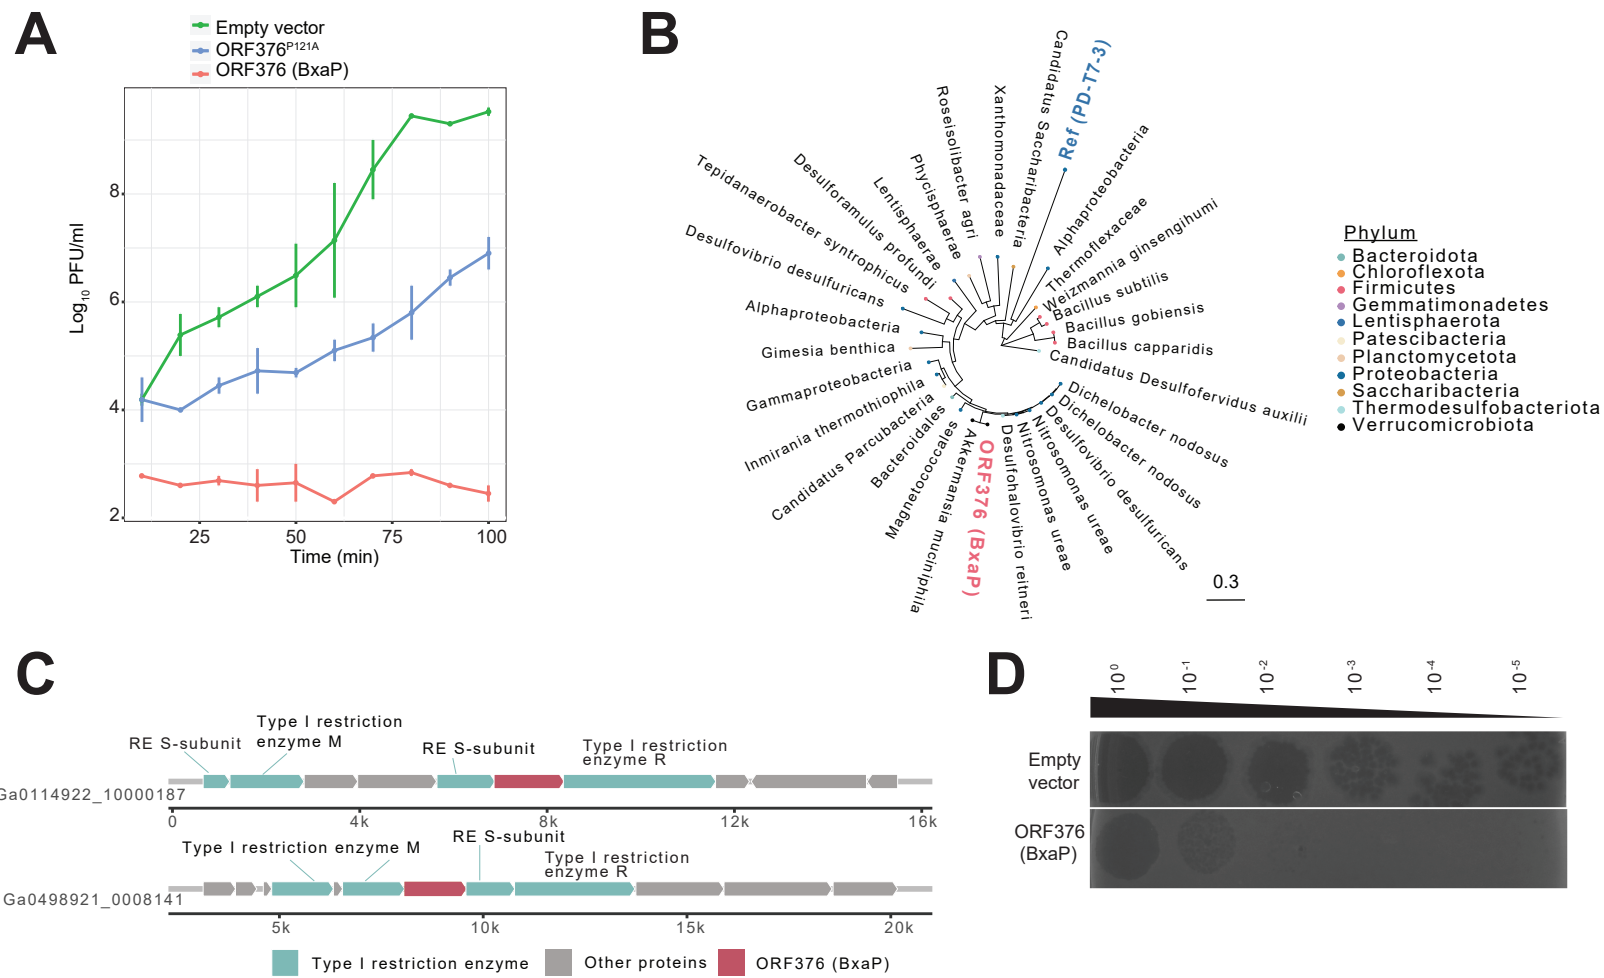

### Supplementary Figure 5: BxaP protects against phage infection.

(A) One-step growth curves showing measurements of plaque forming units (PFU) over time in T4-infected *E. coli* strain containing either an empty vector, or overexpressing WT or mutant BxaP. Experiments were conducted in duplicates, and error bars represent SEM. (B) Phylogenetic distribution of BxaP homologs in NCBI non-redundant database. Branch tips are colored based on bacteria phyla. PD-T7-3 is included in the tree for reference purposes. (C) Examples of phage genomic loci containing BxaP. The IMG/VR ID are shown beside each scaffold. (D) A 10-fold serial dilution plaque assay of T4 phage on an *E. coli* strain (DH10B) lacking both BREX and type-I RM systems. Image is representative of duplicate. Source data are provided as a Source Data file.

Bxap  
Reference PD-T7-3  
WP 227119521.1 hypothetical protein Desulfovibrio desulfuricans  
WP 029894982.1 hypothetical protein Desulfohalovibrio reitneri  
SNX61233.1 hypothetical protein SAMN06296273 2685 Nitrosomonas ureae  
WP 172424124.1 hypothetical protein Nitrosomonas ureae  
WP 211086234.1 hypothetical protein Bacillus capparidis  
WP 053605790.1 hypothetical protein Bacillus gobiensis  
MBR5129867.1 hypothetical protein Alphaproteobacteria bacterium  
RMH17673.1 hypothetical protein D6698 08045 Gammaproteobacteria bacterium

-----M/VATVDLSHYSEQ PAAE DRPLFDEAVDTGKAGAL RATFVM VLACAESLKRFRFAEQ- RDSTA  
-----MDVRIFLESQSKYIDRRTRKYFEEVYKSYANGCYRSATVMWVWVCDIIFKLQELRDVHNDV  
-----MTAPVDLSHYADNLAADRPLFDDAVEAGKAGALRAAYVMWLACAESLKRFRFAEQ-RDGAA  
-----MSAPVDLSHYADNLAADRPLFDDAVESGKAGALRAAYVMWLACAESLKRFRFAEQ-RDGAA  
-----MSAPVDLSHYADNLAADRPLFDDAVESGKAGALRAAYVMWLACAESLKRFRFAEQ-RDGAA  
-----MDFNVLRGQIVEDRDKVLFDEAVNCLNGNALRAAYITTWISTAESLKLKFDYDMS- RDHEI  
-----MLPDKKMYFQFLIRYLLINFSNSEEEDMDFNVLRGQIVEDRDKVLFDEAVNCLNGNALRAAYITTWISTAESLKLKFDYDMS- RDHEI  
-----MGFDIS-----KIKNKEDRALISDAIKLCENGFYRASVIMAWLSCAESLKRFRFELGK-RDSNA  
-----MSEPIQEPNVQPVDLSNYSAAILYSEDRLPFDVAATAKAGALRAAYVMWLACAESLKRFRFAEQ-RDSAA

121

Bxap  
Reference PD-T7-3  
WP 227119521.1 hypothetical protein Desulfovibrio desulfuricans  
WP 029894982.1 hypothetical protein Desulfohalovibrio reitneri  
SNX61233.1 hypothetical protein SAMN06296273 2685 Nitrosomonas ureae  
WP 172424124.1 hypothetical protein Nitrosomonas ureae  
WP 211086234.1 hypothetical protein Bacillus capparidis  
WP 053605790.1 hypothetical protein Bacillus gobiensis  
MBR5129867.1 hypothetical protein Alphaproteobacteria bacterium  
RMH17673.1 hypothetical protein D6698 08045 Gammaproteobacteria bacterium

-GKIVGGIATKEKAHQAVDKF---VLTKACEYGF-FISDSEYTVLNHIYEMRCLYGHYPYEE-----APSEEQVHAAAMVVEHVLSP  
AEKILLEIALQNDPDPSPYKWEKELKRVFERTQLLDTASNHVKLLIQKRRHLSAHPVISEDLTLEPTQEMIRSDNRNIEVLSKP  
-GKIVGEIETKEKEKAVDKF---VLMKAHEYGF-FVSDSGHTVLNHIYEMRCLYGHYPYEE-----APSEQVSHAAAVVVEHVLSP  
-GKIVGEIETKEKEKAVDKF---VLMKAHEYGF-FVSDSGHTVLNHIYEMRCLYGHYPYEE-----APSEQVSHAAAVVVEHVLSP  
-GKIVGEIETKEKEKAVDKF---VLMKAHEYGF-FVSDSGHTVLNHIYEMRCLYGHYPYEE-----APSEQVSHAAAVVVEHVLSP  
-----MRCLYGHYPYEE-----APSEQVSHAAAVVVEHVLSP  
KKKVIKIEDLEQQRPTDSF---LIRSAKDFG-LISAEQSKLEHMKDMRGVYAHPLNA-----APSDSEVELAIELSNVILSQP  
KKKVIKIEDLEQQRPTDSF---LIRSAKDFG-LISAEQSKLEHMKDMRGVYAHPLNA-----APSDSEVELAIELSNVILSQP  
-GKLYKNIIELEKQHSVDNE---JINGAFNFN-LISDTEKEKLFHFSMRSVYSHYPYEE-----APSKVDCEQIENIQLVSRP  
-GSIVGDIETKEHRSVDK---VLDKAHEYGF-FLSDPGHTILNHIYEMRCLYGHYPYEE-----APSEQVSHAAAVVVEHVLSP

Bxap  
Reference PD-T7-3  
WP 227119521.1 hypothetical protein Desulfovibrio desulfuricans  
WP 029894982.1 hypothetical protein Desulfohalovibrio reitneri  
SNX61233.1 hypothetical protein SAMN06296273 2685 Nitrosomonas ureae  
WP 172424124.1 hypothetical protein Nitrosomonas ureae  
WP 211086234.1 hypothetical protein Bacillus capparidis  
WP 053605790.1 hypothetical protein Bacillus gobiensis  
MBR5129867.1 hypothetical protein Alphaproteobacteria bacterium  
RMH17673.1 hypothetical protein D6698 08045 Gammaproteobacteria bacterium

VKLRHGFQKQLLTLNLLGSPNFDLDDQQTAVLAFKTDILPRLDDDIYGWLLDNYWG-----ELEKISDDSSMAIFFRRGTWFSCTMLTEI  
PFMSQKILSTFVADLEKVKDLFSDNALKYLKDYKFKSL NKEVLVKIFKGLWKF5FRSEEAKEPLNREINI---RAMKLIKEDRQA  
VKLRHGFQKQLLTLNLLGSPNFDLDDQQTAVLAFKTDILPRLDESIGHWLLDNYWE-----ELEKFSDDSSMAIFFRRGTWFSRTMLTEV  
VKLRHGFQKQLLTLNLLGSPNFDLDDQQTAVLAFKTDILPRLDETIHGWLLDNYWA-----ELEKFSDDSSMAIFFRRGTWFSRTMLTEV  
VKLRHGFQKQLLTLNLLGSPNFDLDDQQTAVLAFKTDILPRLDETIHGWLLDNYWA-----ELEKFSDDSSMAIFFRRGTWFSRTMLTEV  
VKLRHGFQKQLLTLNLLGSPNFDLDDQQTAVLAFKTDILPRLDETIHGWLLDNYWA-----ELEKFSDDSSMAIFFRRGTWFSRTMLTEV  
ALLKHAFVQSLVTSIFENHHYLDSDSTETVQKAAISTLNHVHSSVFPYFKLLIE-----NLNKKVSKDFTKDLFERRGSVFL-DMLLKC  
ALLKHAFVQSLVTSIFENHHYLDSDSTETVQKAAISTLNHVHSSVFPYFKLLIE-----NLNKKVSKDFTKDLFERRGSVFL-DMLLKC  
VLLKEGGSFILDRLTKEESFLNNSSTEINTYKELISIDPKKYSYFLKKYLQ-----FLNDTPKDRKGLYNRGIMILSYMAFNI  
VKLRHGFQKQLLTLNLLGSPNFDLDDQQTAVLAFKTDILPRLDESIGHWLLDNYWE-----ELEELEDDSSMAIFFRRGTWFSCTMLTEV

Bxap  
Reference PD-T7-3  
WP 227119521.1 hypothetical protein Desulfovibrio desulfuricans  
WP 029894982.1 hypothetical protein Desulfohalovibrio reitneri  
SNX61233.1 hypothetical protein SAMN06296273 2685 Nitrosomonas ureae  
WP 172424124.1 hypothetical protein Nitrosomonas ureae  
WP 211086234.1 hypothetical protein Bacillus capparidis  
WP 053605790.1 hypothetical protein Bacillus gobiensis  
MBR5129867.1 hypothetical protein Alphaproteobacteria bacterium  
RMH17673.1 hypothetical protein D6698 08045 Gammaproteobacteria bacterium

GID- VFSHDDWH--DRSRFP---KILMRVC-SIADIFKEIGKRAQDSLVLGLIA---ESATRA---SVLTYLEQLINGALTQRQR  
MVD5VKAETAYY--SNISNHDAAKALIEFISMEKEYNALDSDSVKE-LIKPIK-----DNISYFGIAFFISEEPEEHI  
GID-VFSHDDWH--DRSRFP---KILMRVC-SIADIFKEIGKRAQDSLVLGLIA---ESATRA---SVLTLERLSINGALTRRQQ  
GID-VFSHDDWH--DRSRFP---KILMRVC-SIADIFKEIGKRAQDSLVLGLIA---EAATRA---SVLTLERLSINGALTRRQQ  
GID-VFSHDDWH--DRSRFP---KILMRVC-SIADIFKEIGKRAQDSLVLGLIA---EAATRA---SVLTLERLSINGALTRRQQ  
SLK-NFSTESWLEGLLHKYP---SIITKVF- VKEDYWTHLNDILKDMAMIGHLIEPIGDGVEVTPSLENLTVLNLYNQDLLNERHV  
SLK-NFSTESWLEGLLHKYP---SIITKVF- VKEDYWTHLNDILKDMAMIGHLIEPIGDGVEVTPSLENLTVLNLYNQDLLNERHV  
GIENIWSNEEPE-NILYTYR---NASLNVF-AELNIFLLDQKFNIIIRLFE---DIPDNL----SLIKYLD5FYKINLTENQR  
GVD-VFSHDDWH--ERAGRFP---KTLMRVC-GIADIFKEIGNRAQDALVGSILV---ESSTHA---SVLTYLERLNDGALSVRQQ

ERF-----VECVSE--MSLD---LLMSAGLSTKTCYRKLIDAMKSHNWNLYQNPADIIVSNQPEQAADLDEKQENLGRN  
NRV-----TKRISEYKYYKGDNGNFLNQHLAI--- FKNVCSELGESEYRDFGIACFINSADFER-----  
ERF-----VEHVSE--MPSS---AIRSAGLSTKTCYKGLIDAMKSHNWNLYQNPADIIVSNQPEQAADLDEKQENLGRN  
ERF-----VEHVSE--MPSS---AIRSAGLSTKTCYKGLIDAMKSHNWNLYQNPADIIVSNQPEQAADLDEKQENLGRN  
ERF-----VEHVSE--MPSS---AIRSAGLSTKTCYKGLIDAMKSHNWNLYQNPADIIVSNQPEQAADLDEKQENLGRN  
ERF-----VEHVSE--MPSS---AIRSAGLSTKTCYKGLIDAMKSHNWNLYQNPADIIVSNQPEQAADLDEKQENLGRN  
ERF-----KSAVEK--LYIS---KKVSIQIPELWYQAEILSDLKTNSWYQNPVIEAIQSLGVEKINTLDFSEFLIELGRN  
ERF-----KSAVEK--LYIS---KKVSIQIPELWYQAEILSDLKTNSWYQNPVIEAIQSLGVEKINTLDFSEFLIELGRN  
RKF-----SFIVFD--INWR---DLPSIELSLKALYPRISGLKSHNWHMNPQACEYIHFHGFSD-DTSLDSEYVELGRN  
ERF-----TERISE--MDSS---ELRSALSTKTCYKGLIAAMKSYDWVYQNPADIIVSNQPEQAADLDEKQENLGRN

LLQAGEGSAASAEFL- EKL5Q-DKIS--WPFVVISGAMES-FTNENNQIRFKRHRWVRLSIID-HLQPELQGRLIHQISEVSDAG  
-----ADIYF-DRFIDKDLAN--YSSEQLMTLLEGA---NKNQCQYWRNR-----SRNGNDSIRILKAANKPLDGG  
LLQAGEGAGTANSANEFL-EKLSQ-DGTS--WPFHVVRGAMES-FTNEDNQIRFKDRHLGRVLAID- HLQELQDQLIAEIASVSDAG  
LLQAGEGAGTANSANEFL-EKLSQ-DGTS--WPFHVVRGAMES-FTNEDNQIRFKDRHLGRVLAID- HLQELQDQLIAEIASVSDAG  
LLQAGEGAGTANSANEFL-EKLSQ-DGTS--WPFHVVRGAMES-FTNEDNQIRFKDRHLGRVLAID- HLQELQDQLMAELASVSDAG  
LLQAGEGAGTANSANEFL-EKLSQ-DGTS--WPFHVVRGAMES- FTNEDNQIRFKDRHLGRVLAID-HLQELQDQLMAELASVSDAG  
ILQAADGQARDAISFV-SSLYK-SEFK--SSPYLVEGIFLET- FINENKRFRRK-RYRKPALSAVL-CVNEQETDKIADKAIMLLKDC  
ILQAADGQARDAISFV-SSLYK-SEFK--SSPYLVEGIFLET- FINENKRFRRK-RYRKPALSAVL-CVNEQETDKIADKAIMLLKDC  
ILQSYVGGSSGASHLL-YRIST-VGN---TPISIQIGVIEEC- FYDDNKKLRLKISNPQIEIQIDKLNFSFEQENLFEIATNIQQT  
ILQSAEGASNAARFL-VRLSD-EGSR--WPLGIVRGIALET-FTNEKQELRFKTKHLHRVLDALD- RLPNTELEQVVAESESIVKS

Bxap  
Reference PD-T7-3  
WP 227119521.1 hypothetical protein Desulfovibrio desulfuricans  
WP 029894982.1 hypothetical protein Desulfohalovibrio reitneri  
SNX61233.1 hypothetical protein SAMN06296273 2685 Nitrosomonas ureae  
WP 172424124.1 hypothetical protein Nitrosomonas ureae  
WP 211086234.1 hypothetical protein Bacillus capparidis  
WP 053605790.1 hypothetical protein Bacillus gobiensis  
MBR5129867.1 hypothetical protein Alphaproteobacteria bacterium  
RMH17673.1 hypothetical protein D6698 08045 Gammaproteobacteria bacterium

APK-Y-L--GGRDNFRNVDLSL-----NAYSWATPPLLES-EAKSAIEETEEEWPLKS----- 500  
----F----DFSKYDNLPL----- 455  
VPK-D-W--VDRDDFENAVDSL-----KAYPWAAPLVTSL-EAKAASLSAEEEDA----- 495  
APK-D-W--VDRDDFESAVESL-----NAYAWAAPLVASL-EAKSASLSAEEEDA----- 495  
TPK-D-W--VDRDDFESAVESL-----NAYAWAAPLVASL-EAKSASLSAEEEDA----- 495  
TPK-D-W--VDRDDFESAVESL-----NAYAWAAPLVASL-EAKSASLSAEEEDA----- 387  
SLR-G-W--FNEETFEYLEYLDLILNFKLKLKKEAFEKFNLFV-KETCDRFKQEEEEEELEV----- 514  
SLR-G-W--FNEETFEYLEYLDLILNFKLKLKKEAFEKFNLFV-KETCDRFKQEEEEEELEV----- 541  
EIKRN-W--DWSEYDQIPDTG-----L-LGKIKKVLNENYVFPF----- 480  
EPQ-F-W--VSRRELGDVIDSL-----KPFWSALISLSS-ETKAGEFTGEDEET----- 503

**Supplementary Figure 6: Primary sequence alignment of some BxaP homologs. The shaded area shows mutated site used to generate the P121A BxaP mutant.**
