# Supplementary material for: Structure-guided discovery of anti-CRISPR and anti-phage defense proteins
Source: PubMed Central journal article supplement (PMC10799925; doi:10.1038/s41467-024-45068-7), 2024-01-20
Supplement: 41467_2024_45068_MOESM2_ESM.pdf [file 41467_2024_45068_MOESM2_ESM.pdf]

### Structure-guided discovery of anti-CRISPR and anti-phage defense proteins

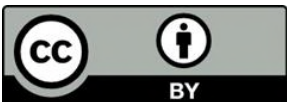

**Open Access** This file is licensed under a Creative Commons Attribution 4.0 International License, which permits use, sharing, adaptation, distribution and reproduction in any medium or format, as long as you give appropriate credit to the original author(s) and the source, provide a link to the Creative Commons license, and indicate if changes were made. In the cases where the authors are anonymous, such as is the case for the reports of anonymous peer reviewers, author attribution should be to 'Anonymous Referee' followed by a clear attribution to the source work. The images or other third party material in this file are included in the article's Creative Commons license, unless indicated otherwise in a credit line to the material. If material is not included in the article's Creative Commons license and your intended use is not permitted by statutory regulation or exceeds the permitted use, you will need to obtain permission directly from the copyright holder. To view a copy of this license, visit <http://creativecommons.org/licenses/by/4.0/>.

**Editorial Note:** This manuscript has been previously reviewed at another journal that is not operating a transparent peer review scheme. This document only contains reviewer comments and rebuttal letters for versions considered at *Nature Communications*.

Reviewer #3 (Remarks to the Author):

Congrats to the authors on a very nice study.

Not sure how the system that is abortive has weakened growth at MOI 0.1, perhaps it is being overwhelmed! Therefore, I would expect at higher MOI it would also look more overwhelmed and perhaps mislead into abortive conclusion. So I would push back on this conclusion but not uncommon to call this abortive in the field even if not fully fleshed out.

Either way, I think paper is a great resource and love the structure guided approaches. Ready to publish I think.

Congrats to the authors on a very nice study.

Not sure how the system that is abortive has weakened growth at MOI 0.1, perhaps it is being overwhelmed! Therefore, I would expect at higher MOI it would also look more overwhelmed and perhaps mislead into abortive conclusion. So I would push back on this conclusion but not uncommon to call this abortive in the field even if not fully fleshed out.

Either way, I think paper is a great resource and love the structure guided approaches. Ready to publish I think.

Thank you!

BxaP is a structural homolog of a reported abortive infection protein. Nevertheless, we have avoided definitive claims of BxaP being an abortive protein but rather, use cautionary wording. In this regard, we renamed BxaP as “BREX/RM-associated Anti-phage Protein” instead of “BREX/RM-associated Abortive Protein”.
