# Supplementary material for: Structure-guided discovery of anti-CRISPR and anti-phage defense proteins
Source: PubMed Central journal article supplement (PMC10799925; doi:10.1038/s41467-024-45068-7), 2024-01-20
Supplement: 41467_2024_45068_MOESM3_ESM.pdf [file 41467_2024_45068_MOESM3_ESM.pdf]

## **Description of Additional Supplementary Files:**

**Supplementary Data 1:** Published Acrs and their properties.

**Supplementary Data 2:** Comparison between putative Acrs and published Acrs.

**Supplementary Data 3:** Performance of Acr prediction tools with AcrVA5Bsp.

**Supplementary Data 4:** Putative Acrs structurally homologous to two known Acrs.

**Supplementary Data 5:** Comparison between putative anti-phage proteins and published defense systems.

**Supplementary Data 6:** Nucleic acid sequences used in this study.

**Supplementary Data 7:** Bacteria strain and plasmids used in this study.
